# Supplementary material for: Leptospiral flagellar sheath protein FcpA interacts with FlaA2 and FlaB1 in Leptospira biflexa
Source: PubMed Central journal article supplement (PMC5892894; doi:10.1371/journal.pone.0194923), 2018-04-10
Supplement: pone.0194923.s003.pdf [file pone.0194923.s003.pdf]

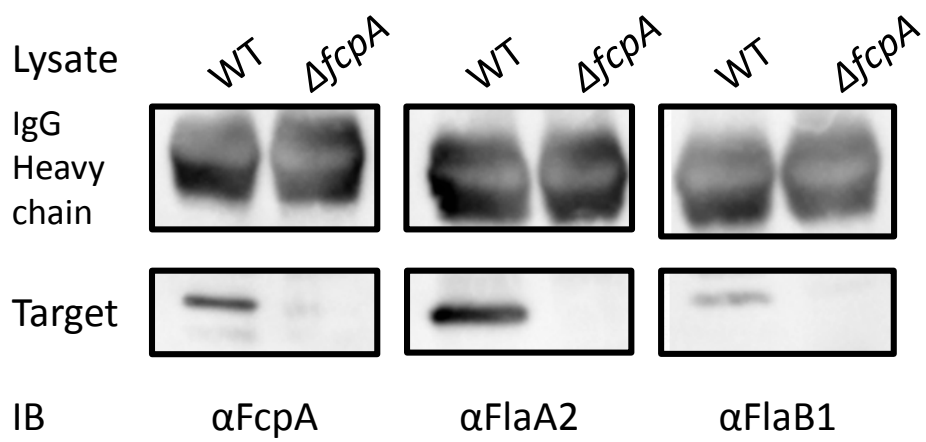

**S3 Fig. Immunoprecipitation of flagellar proteins with anti-FcpA.**
