# Supplementary material for: Leptospiral flagellar sheath protein FcpA interacts with FlaA2 and FlaB1 in Leptospira biflexa
Source: PubMed Central journal article supplement (PMC5892894; doi:10.1371/journal.pone.0194923), 2018-04-10
Supplement: pone.0194923.s004.pdf [file pone.0194923.s004.pdf]

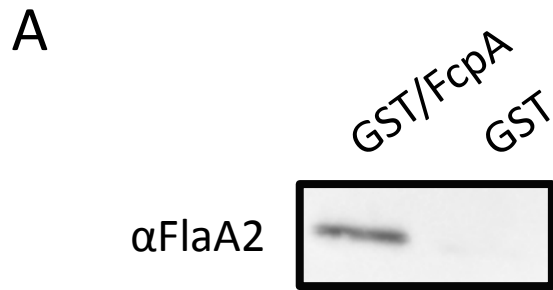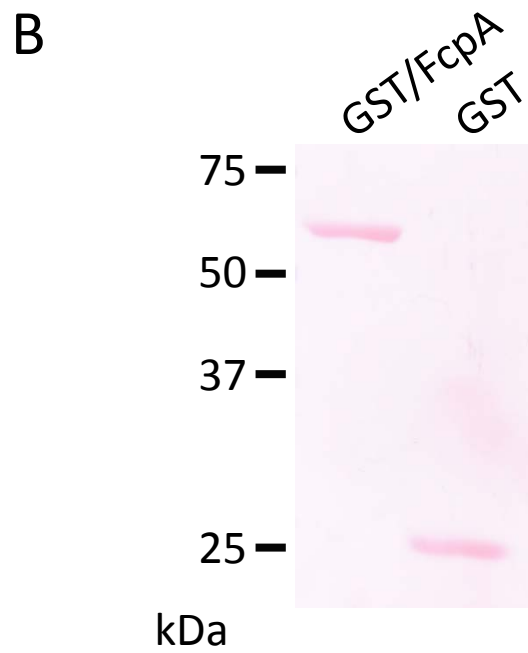

**S4 Fig. Pull-down of FlaA2 by GST/FcpA fusion proteins.**
