# Supplementary material for: Leptospiral flagellar sheath protein FcpA interacts with FlaA2 and FlaB1 in Leptospira biflexa
Source: PubMed Central journal article supplement (PMC5892894; doi:10.1371/journal.pone.0194923), 2018-04-10
Supplement: pone.0194923.s005.pdf [file pone.0194923.s005.pdf]

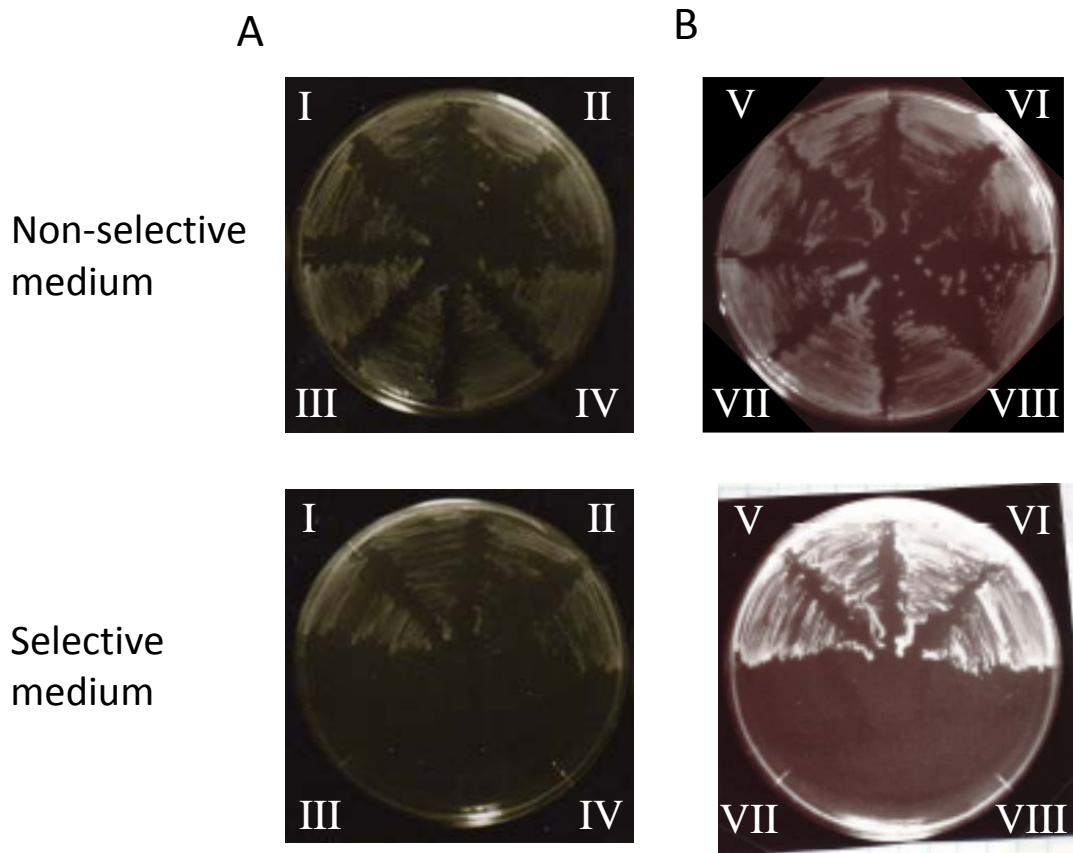

**S5 Fig. Two-hybrid analysis of the interaction between FcpA and FlaA2 (A) and FcpA and FlaB1 (B).**
