# Supplementary material for: Leptospiral flagellar sheath protein FcpA interacts with FlaA2 and FlaB1 in Leptospira biflexa
Source: PLoS One. 2018 Apr 10;13(4):e0194923. doi: 10.1371/journal.pone.0194923 (PMC5892894; doi:10.1371/journal.pone.0194923)
Supplement: S1 Fig — Western blotting was performed with anti-FlaB antisera against recombinant FlaB proteins. Lanes M, molecular weight marker; 1, E. coli lysate expressing rFlaB1/GST; 2, E. coli lysate expressing rFlaB2/His; 3, E. coli lysate expressing rFlaB3/His; 4, E. coli lysate expressing rFlaB4/GST. Asterisks indicate recombinant FlaB proteins. (PDF) [file pone.0194923.s001.pdf]

[illegible]

**S1 Fig. Locations of peptide fragments (indicated in red) used for the preparation of antiserum for each FlaB protein (A) and the specificity of each anti-FlaB antiserum (B).**
